# Supplementary material
Source: ML conference proceedings conference paper supplement (https://proceedings.neurips.cc/paper_files/paper/2018/hash/d0921d442ee91b896ad95059d13df618-Abstract.html)
Supplement: Supplementary file [file d0921d442ee91b896ad95059d13df618-Supplemental.zip]

---

## Supplementary material of “Neural Edit Operations for Biological Sequences”

---

### A Derivatives of EINNs

Here, we compute the derivatives of the Needleman-Wunsch score,  $s_{\text{NW}}(x_{1:m}, y_{1:n}; g)$ . We use the notation in Algorithm 1. Since  $s_{\text{NW}}(x_{1:m}, y_{1:n}; g) = F_{m,n}$ , we consider  $\partial F_{m,n}/\partial x_i$ ,  $\partial F_{m,n}/\partial y_j$ , and  $\partial F_{m,n}/\partial g$ .

Let us denote  $Q_{i,j} = \partial F_{m,n}/\partial F_{i,j}$ . We have

$$\begin{aligned} \frac{\partial F_{m,n}}{\partial F_{i,j}} &= \frac{\partial F_{m,n}}{\partial F_{i+1,j}} \frac{\partial F_{i+1,j}}{\partial F_{i,j}} + \frac{\partial F_{m,n}}{\partial F_{i,j+1}} \frac{\partial F_{i,j+1}}{\partial F_{i,j}} + \frac{\partial F_{m,n}}{\partial F_{i+1,j+1}} \frac{\partial F_{i+1,j+1}}{\partial F_{i,j}} \\ &= Q_{i+1,j} \cdot \frac{\partial F_{i+1,j}}{\partial F_{i,j}} + Q_{i,j+1} \cdot \frac{\partial F_{i,j+1}}{\partial F_{i,j}} + Q_{i+1,j+1} \cdot \frac{\partial F_{i+1,j+1}}{\partial F_{i,j}}. \end{aligned} \quad (2)$$

In Algorithm 1, we have the following forward recursion:

$$F_{i+1,j} = \max^\gamma(F_{i,j-1} + x_i \cdot y_j, F_{i,j} - g, F_{i+1,j-1} - g).$$

The derivative of the softmax function  $\max^\gamma(a, b, c)$  with respect to  $b$  can be calculated as  $\exp(\{b - \max^\gamma(a, b, c)\}/\gamma)$ . Hence, we obtain

$$\frac{\partial F_{i+1,j}}{\partial F_{i,j}} = \exp\left(\frac{F_{i,j} - g - F_{i+1,j}}{\gamma}\right) = \varphi_\gamma(F_{i,j} - g, F_{i+1,j}),$$

which corresponds to  $b$  in Line 10 of Algorithm 2. We can derive the remaining terms in Eq. (2) similarly.

Now, we compute  $\partial s_{\text{NW}}/\partial x_i$ ,  $\partial s_{\text{NW}}/\partial y_j$ , and  $\partial s_{\text{NW}}/\partial g$ . Because of the chain rule, we have

$$\begin{aligned} \frac{\partial F_{m,n}}{\partial x_i} &= \sum_{j=1}^n \frac{\partial F_{m,n}}{\partial F_{i,j}} \frac{\partial F_{i,j}}{\partial x_i} \\ &= \sum_{j=1}^n Q_{i,j} \exp\left(\frac{F_{i-1,j-1} + x_i \cdot y_j - F_{i,j}}{\gamma}\right) \cdot y_j \\ &= \sum_{j=1}^n Q_{i,j} \exp(H_{i,j}/\gamma) \cdot y_j. \end{aligned}$$

We can derive  $\partial s_{\text{NW}}/\partial y_j$  similarly. Finally, we consider  $\partial s_{\text{NW}}/\partial g$ . Following Algorithm 3, we define  $a, b$  and  $c$  as follows.

$$a = \varphi_\gamma(F_{i-1,j-1} + x_i \cdot y_j, F_{i,j}), \quad b = \varphi_\gamma(F_{i-1,j} - g, F_{i,j}), \quad c = \varphi_\gamma(F_{i,j-1} - g, F_{i,j}).$$

Based on the chain rule, we can calculate  $\frac{\partial F_{i,j}}{\partial g}$  as follows.

$$\begin{aligned} P_{i,j} &:= \frac{\partial F_{i,j}}{\partial g} = \frac{\partial}{\partial g} \max^\gamma(F_{i-1,j-1} + x_i \cdot y_j, F_{i-1,j} - g, F_{i,j-1} - g) \\ &= a \cdot \frac{\partial}{\partial g} \{F_{i-1,j-1} + x_i \cdot y_j\} + b \cdot \frac{\partial}{\partial g} \{F_{i-1,j} - g\} + c \cdot \frac{\partial}{\partial g} \{F_{i,j-1} - g\} \\ &= a \cdot P_{i-1,j-1} + b \cdot (P_{i-1,j} - 1) + c \cdot (P_{i,j-1} - 1) \end{aligned}$$

This corresponds to the recursive formula in Algorithm 3. Hence, we obtain  $\partial s_{\text{NW}}/\partial g = \partial F_{m,n}/\partial g = P_{m,n}$ .

## B Results for ResNet-like architectures

Figure 7 shows the residual block (ResBlock) used in our experiments, which is similar to the ConvBlock (Fig. 6 (b)), but employs the additive skip connection. The number of filters  $N$  is chosen from  $\{48, 64, 96, 128\}$ . In the skip connection of the first layer, we have to force the input/output dimensions the same. To this end, the input dimension size ( $= 44$ ) is converted into  $3N$  by applying Conv-1 in the skip connection. The training procedure used is equivalent to that used in our experiment for deep CNNs (i.e., 300-epoch training with RMSProp).

Table 3 shows the result of our experiment. To control the model capacity, we tried different configurations by changing the number of blocks, the filter size  $N$ , and the weight decay parameter. Overall, the CB513 accuracies obtained in this experiment are by up to 71.0%, which are slightly lower than our best result obtained in Section 6 (71.5%).

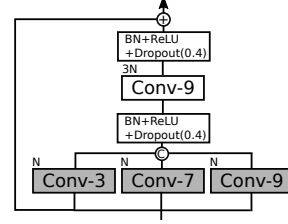

Figure 7: Residual blocks used in the experiment.  $N$  is the number of filters.

Table 3: CB513 accuracy for ResNet-like models. Note that these results are for non-ensemble models. (\*: with multitasking / †: with data augment /  $N$ : filter size / WD: Weight decay)

| Method                       | $N$ | WD        | Acc. (%)    |
|------------------------------|-----|-----------|-------------|
| 4-ResBlocks*†                | 128 | 0         | 70.8        |
| 8-ResBlocks*†                | 128 | 0         | 70.8        |
| 12-ResBlocks*†               | 128 | 0         | 70.4        |
| 16-ResBlocks*†               | 128 | 0         | 70.4        |
| 8-ResBlocks*†                | 96  | 0         | 70.7        |
| 8-ResBlocks*†                | 64  | 0         | 70.6        |
| 8-ResBlocks*†                | 48  | 0         | 70.7        |
| 4-ResBlocks*†                | 128 | $10^{-6}$ | 70.6        |
| 4-ResBlocks*†                | 128 | $10^{-5}$ | 70.6        |
| 4-ResBlocks*†                | 128 | $10^{-4}$ | 70.5        |
| 4-ResBlocks*†                | 128 | $10^{-3}$ | 70.5        |
| 8-ResBlocks*†                | 128 | $10^{-6}$ | 70.8        |
| 8-ResBlocks*†                | 128 | $10^{-5}$ | 70.9        |
| 8-ResBlocks*†                | 128 | $10^{-4}$ | <b>71.0</b> |
| 8-ResBlocks*†                | 128 | $10^{-3}$ | 70.9        |
| Our best result in Section 6 | —   | 0         | (71.5)      |

## C Effect of data augmentation

To investigate the effect of the data augmentation mentioned in experiments, we show an evaluation result here. In this experiment, we employed our 8-block CNN architecture. When we changed the probability of random replacement, the results were as follows. Without noising (0%), we have 70.6% accuracy on CB513 dataset, and 71.0% (noise probability: 5%), 71.1% (10%), 71.2% (15%), 71.2% (20%), 71.1% (25%).

We consider that this improvement comes from “regularization effect.” Random replacement forces the label-invariance around the training data. Accordingly, the predictor will be “flat”, which could lead to good generalization.

## D Regular Expression Cheatsheet

Table 3 shows the basic building blocks of regular expressions used in this paper.

| Table 3: Regular expressions used in this paper. |                                      |
|--------------------------------------------------|--------------------------------------|
| Regular Expression                               | Description                          |
| /a/                                              | Matches a single character, a        |
| /abc/                                            | Matches a string, abc                |
| /(abc ac)/                                       | Matches abc or ac                    |
| /./                                              | Matches a any single character       |
| /[ab]/                                           | Matches a or b                       |
| /ab?/                                            | Matches a, followed by zero or one b |

Combining these regular expressions, we obtain more complex ones. For example, `/a[bc]a[ac]?ba./` represents a set of strings that match

- a, , followed by b or c, followed by a, *optionally* followed by a or c, followed by ba, followed by any character.
